# Supplementary material for: Down syndrome cell adhesion molecule like-1 (DSCAML1) links the GABA system and seizure susceptibility
Source: PubMed Central journal article supplement (PMC7706048; doi:10.1186/s40478-020-01082-6), 2020-11-30
Supplement: 40478_2020_1082_MOESM2_ESM.pdf [file 40478_2020_1082_MOESM2_ESM.pdf]

***Down Syndrome Cell Adhesion Molecule Like-1 (DSCAML1) links the GABA system and seizure susceptibility***

**Authors:**

Yoneko Hayase\*, Shigeru Amano, Koichi Hashizume, Tadashi Tominaga, Hiroyuki Miyamoto, Yukie Kanno, Yukiko Ueno-Inoue, Takayoshi Inoue, Mayumi Yamada, Shigehiro Ogata, Balan Shabeesh, Ken Hayashi, Yoshiki Miura, Kentaro Tokudome, Yukihiro Ohno, Takuma Nishijo, Toshihiko Momiyama, Yuchio Yanagawa, Akiko Takizawa, Tomoji Mashimo, Tadao Serikawa, Akihiro Sekine, Eiji Nakagawa, Eri Takeshita, Takeo Yoshikawa, Chikako Waga, Ken Inoue, Yu-ichi Goto, Yoichi Nabeshima, Nobuo Ihara, Kazuhiro Yamakawa, Shinichiro Taya\*, Mikio Hoshino\*.

**\*Corresponding authors:**

Yoneko Hayase MD, PhD, Shinichiro Taya PhD, and Mikio Hoshino MD, PhD

**Supplementary material**

**Supplemental Table 1. List of materials used in this study**

**Supplemental Table 2. Genotype and minor allele frequency of 2 polymorphisms in the *DSCAML1* gene**

**Supplemental Table 3. The deleterious prediction of 2 polymorphisms in the *DSCAML1* gene by ANNOVAR**

**Supplemental Table 1. List of materials used in this study**

| Reagent or resource                                                                                                           | Manufacture    | Identifier                                                                                |
|-------------------------------------------------------------------------------------------------------------------------------|----------------|-------------------------------------------------------------------------------------------|
| <b>Antibodies</b>                                                                                                             |                |                                                                                           |
| Rabbit anti-glutaminase (1:500)                                                                                               | Abcam          | Cat#ab156876, RRID: AB_2721038                                                            |
| Mouse anti-GAD67 (1:500)                                                                                                      | Merck          | Cat# MAB5406, RRID: AB_2278725                                                            |
| Rabbit anti-NG2 (1:00)                                                                                                        | Merck          | Cat# AB5320, RRID: AB_91789                                                               |
| Goat anti-DSCAML1 (1:200)                                                                                                     | R&D systems    | Cat# AF3315; RRID: AB_2095469                                                             |
| Goat anti-somatostatin (SST) (1:100)                                                                                          | Santa Cruz     | Cat# sc-7819, RRID: AB_2302603 (discontinued Dec 31, 2016 due to animal welfare concerns) |
| Rabbit anti-GFAP (1:500)                                                                                                      | Dako Japan     | Cat# Z0334, RRID: AB_10013382                                                             |
| Donkey anti- goat, rabbit, mouse and chick fluorescent-conjugated secondary antibodies with Alexa 488, Alexa 568 or Alexa 647 | Thermo Fisher  | Cat# AlexaR488, AlexaR568, and AlexaR647                                                  |
| <b>Animals and cell lines</b>                                                                                                 |                |                                                                                           |
| ICR/ihr rat (original strain of IER/ihr) (ICR)                                                                                | Kyoto Univ.    | NBRP-rat, #290                                                                            |
| IER/ihr rat (IER)                                                                                                             | Kyoto Univ.    | NBRP-rat, #291                                                                            |
| WKY/Izm rat (WKY)                                                                                                             | Japan SLC Inc. | WKY/Izm rat                                                                               |
| WKAH/Hkm rat (WKAH)                                                                                                           | Japan SLC Inc. | WKAH/Hkm rat                                                                              |
| C57BL/6N (mouse WT)                                                                                                           | Japan SLC Inc. | C57BL/6Nslc                                                                               |
| Dscaml1GT2/GT2 (C57BL/6J-Tg) mouse                                                                                            | TIGM, Texas    | TG0118 (Dscaml1): AF487347                                                                |
| GAD67GFP KI mouse (CR.Cg-Gad1 <sup>tm1.1Tama</sup> )                                                                          | Gunma Univ.    | IMSR Cat# RBRC03674, RRID:IMSR_RBRC03674                                                  |
| DscamlA2105T hDSCAML1 p.2105T A>T KI mouse                                                                                    | This paper     | This paper                                                                                |
| COS-7 (Cercopithecus aethiops, kidney, SV40 -transformed)                                                                     | ECA            | EC87021302-F0_Cell 23:175 (1981)                                                          |

---

**Oligonucleotides for the markers of linkage analysis**

|                                                          |            |                                                  |
|----------------------------------------------------------|------------|--------------------------------------------------|
| D8Thy1, forward:<br>GTATGATGGGCAGTGAAGAG                 | NCBI       | UniSTS: 120087;<br>47002972..47003184 Thy1       |
| D8Thy1, reverse:<br>TGTTTGGTCCACAAAGGCTC                 | NCBI       | UniSTS: 120087;<br>47002972..47003184 Thy1       |
| D8Got62, forward:<br>TTCTAGCTTCTCAGGCACCAA               | NCBI       | UniSTS: 115842;<br>47143390..47143613 Cbl        |
| D8Got62, reverse:<br>AGTGGACATCTTACTCAGAGGACA            | NCBI       | UniSTS: 115842;<br>47143390..47143613 Cbl        |
| D8Got66, forward:<br>CCACCCTCTCATGGCTCAC                 | NCBI       | UniSTS: 112149;<br>48458915..48459138<br>Dscaml1 |
| D8Got66, reverse:<br>AGTGGACATCTTACTCAGAGGACA            | NCBI       | UniSTS: 112149;<br>48458915..48459138<br>Dscaml1 |
| D8Mhos18 <sup>a</sup> , forward:<br>TTTCCTCATTGGGAAAGCAC | This paper | NCBI; 48605174..48605624<br>Dscaml1              |
| D8Mhos18 <sup>a</sup> , reverse:<br>ACACAAGCCTGTCTCACAC  | This paper | NCBI; 48605174..48605624<br>Dscaml1              |
| D8Mhos11 <sup>a</sup> , forward:<br>CTAGGCCAAGGAAGCAGATG | This paper | NCBI; 48616352..48616928<br>Dscaml1              |
| D8Mhos11 <sup>a</sup> , reverse:<br>GGCAGTAGTCCCAAAGACA  | This paper | NCBI; 48616352..48616928<br>Dscaml1              |
| D8Mhos9 <sup>a</sup> , forward:<br>TTTCCTCATTGGGAAAGCAC  | This paper | NCBI; 48640785..48641006<br>Dscaml1              |
| D8Mhos9 <sup>a</sup> , reverse:<br>GCTTAGCCTCATTGGTGAGC  | This paper | NCBI; 48640785..48641006<br>Dscaml1              |
| D8Mhos6 <sup>a</sup> , forward:<br>ATGGATAGGCCTCCTTTTGG  | This paper | NCBI; 48653159..48653360<br>Dscaml1              |
| D8Mhos6 <sup>a</sup> , reverse:<br>GCCATAATCTGGGTGAGCAT  | This paper | NCBI; 48653159..48653360<br>Dscaml1              |
| D8Mhos3 <sup>a</sup> , forward:<br>AATCAAAATGGGTGGCTGAG  | This paper | NCBI; 48664906..48665056<br>Dscaml1              |
| D8Mhos3 <sup>a</sup> , reverse:<br>CCAAAAGCAAGATGGAGAGG  | This paper | NCBI; 48664906..48665056<br>Dscaml1              |
| D8Got69, forward: GAGAGGAGAACTGGAACGGAC                  | NCBI       | UniSTS: 114710;<br>48836968..48837205 Pcsk7      |
| D8Got69, reverse: TAGGGGACAGCAATTAACAAACA                | NCBI       | UniSTS: 114710;<br>48836968..48837205 Pcsk7      |
| D8Arb27, forward:<br>ATGGGATTCATCTGGTTGTAGG              | NCBI       | UniSTS: 228202;<br>49151912..49152199<br>ApoA1   |
| D8Arb27, reverse:<br>CACCTGTTCCAATAGTAGTTGC              | NCBI       | UniSTS: 228202;<br>49151912..49152199<br>ApoA1   |

**Primer sequence used for the mice genotyping (Dscaml1GT2, Dscaml1A2105T\_KI and GAD67\_KI)**

---

|                                                |      |                                          |
|------------------------------------------------|------|------------------------------------------|
| Dscaml1GT2 (LTR-2): AAATGGCGTTACTTAAGCTAGCTTGC | TIGM | TG0118: Gene trapped<br>Cassette (Right) |
|------------------------------------------------|------|------------------------------------------|

---

---

|                                                          |               |                                         |
|----------------------------------------------------------|---------------|-----------------------------------------|
| Dscaml1GT2 (R-TG0118-lower)<br>GACATTGTACGGGCATGACTCAC   | TIGM          | TG0118: Gene trapped<br>Cassette (Left) |
| Dscaml1A2105T, forward: GCCACCTTACCTCAGAGG               | This paper    |                                         |
| Dscaml1A2105T, reverse: ATTCAGCCACGTTGGTGTG              | This paper    |                                         |
| GAD67EGFP, forward: ACGTAAACGGCCACAAGTTC                 | This paper    | Tamamaki, N (Ref. 28)                   |
| GAD67EGFP, reverse: GGATCTTGAAGTTCGCCTTG                 | This paper    | Tamamaki, N (Ref. 28)                   |
| TaqMan Gene expression assay for rat DSCAML1             | Thermo Fisher | Cat# Rn01421925_mH                      |
| TaqMan Gene expression assay for mouse Dscaml1           | Thermo Fisher | Cat# Mm01174247_m1                      |
| TaqMan Gene expression assay for human Dscaml1           | Thermo Fisher | Cat# HS0032468_m1                       |
| Eukaryotic 18S rRNA endogenous control (VICTM/MGB) probe | Thermo Fisher | Cat# 4319413E                           |

**Primer sequences used for in vitro splicing assay**

|                                                                                      |            |     |
|--------------------------------------------------------------------------------------|------------|-----|
| Genomic Dscaml1 containing exon 12–14, forward:<br>AATTGGATCCATGCCAGCCATGATCACGTCGCA | This paper | N/A |
| Genomic Dscaml1 containing exon 12–14, reverse:<br>AATTGGATCCTCATGATTTGTTCTTGTACTCGA | This paper | N/A |

**Primer sequences used for human DSCAML1 genomic sequences**

|                                       |            |     |
|---------------------------------------|------------|-----|
| Exon 1, forward: CTCCTGTTCCCTGGGCTTGT | This paper | N/A |
| Exon 1, reverse: GGGGCTGACTCTCACTCG   | This paper | N/A |
| Exon 2, forward: AGTCTCTCCCCTTGCCTCTC | This paper | N/A |
| Exon 2, reverse: ATGCCTATGGACACACAGCA | This paper | N/A |
| Exon 3, forward: TGAGCTGACTCCCTGTTCTT | This paper | N/A |
| Exon 3, reverse: TTATCCAGTCCCCACAGAGG | This paper | N/A |
| Exon 4, forward: AGAGACGCTACCCTGCCTCT | This paper | N/A |
| Exon 4, reverse: GGTCTTCCTTGGTGGTTTCA | This paper | N/A |
| Exon 5, forward: TCCCTGAAATGTTCTCTGG  | This paper | N/A |

---

---

|                                         |            |     |
|-----------------------------------------|------------|-----|
| Exon 5, reverse: GGCCTGGTCAGAGACAGGT    | This paper | N/A |
| Exon 6, forward: TACCCCAGCTACACTCCAC    | This paper | N/A |
| Exon 6, reverse: AGTGAGCGCTGGTTTAATGC   | This paper | N/A |
| Exon 7, forward: GGTTGCGGATAGCAGAAGAA   | This paper | N/A |
| Exon 7, reverse: AACCCACAGAGATGGCAAAGG  | This paper | N/A |
| Exon 8, forward: GTAAAAAGGCATCCCTGTGC   | This paper | N/A |
| Exon 8, reverse: TTTTCTGAATGCCAAGCTG    | This paper | N/A |
| Exon 9, forward: CCAGGGGATCTTTGTTCAAG   | This paper | N/A |
| Exon 9, reverse: CCGTGATTGGAAGTGGAAAT   | This paper | N/A |
| Exon 10, forward: GAAGCCCTAGGAGACCCATC  | This paper | N/A |
| Exon 10, reverse: GAGGATGACTCCAGGTGAGG  | This paper | N/A |
| Exon 11, forward: AAATGGCCCTAGATCTGCAA  | This paper | N/A |
| Exon 11, reverse: CCTGCCTCCCCTTCATAGAT  | This paper | N/A |
| Exon 12, forward: GTGGGGTTCCTGTACTCCT   | This paper | N/A |
| Exon 12, reverse: GGTACATTTTTGGGGTGTGG  | This paper | N/A |
| Exon 13, forward: AAGTCCCTGGGAAGAGAAGC  | This paper | N/A |
| Exon 13, reverse: TTCCTGTCATCCTCCACCAT  | This paper | N/A |
| Exon 14, forward: CTAGGGTGCCAGAGTCCTTG  | This paper | N/A |
| Exon 14, reverse: CCAGTGTCCCTCCCTTCAG   | This paper | N/A |
| Exon 15, forward: GCAGTCTGTGTGAGCTGGAC  | This paper | N/A |
| Exon 15, reverse: TGATCCAGAGGTGGACACAA  | This paper | N/A |
| Exon 16, forward: TTTCAGGGGAAGTCAAACAAA | This paper | N/A |
| Exon 16, reverse: GTGGGGATTATTGTGCTGGA  | This paper | N/A |
| Exon 17, forward: AGCATCATCTCAGCGTGTG   | This paper | N/A |

---

---

|                                            |            |     |
|--------------------------------------------|------------|-----|
| Exon 17, reverse: GTGGACCACAGGACCAAAT      | This paper | N/A |
| Exon 18, forward: CTAAGTGGACGCTCCTCTGG     | This paper | N/A |
| Exon 18, reverse: CGGCCCTATAGCCATTATC      | This paper | N/A |
| Exon 19, forward: CCTTGAGGTGAAAGACCCTCT    | This paper | N/A |
| Exon 19, reverse: ACAGTTTGAAGGCCAGGAGA     | This paper | N/A |
| Exon 20, forward: ATGGACCCTCCCCTTCTAAA     | This paper | N/A |
| Exon 20, reverse: TGACCCAAGATGGACACTGA     | This paper | N/A |
| Exon 21, forward: ACTCTGTCCGCTGCATCTCT     | This paper | N/A |
| Exon 21, reverse: AGACCCTGTCTGGGGAGAAC     | This paper | N/A |
| Exon 22, forward: GTCAATGTCTCCAGCCAAT      | This paper | N/A |
| Exon 22, reverse: TGAGAGAGCAGTAGCAGCACA    | This paper | N/A |
| Exon 23, forward: GGCTGGGTTACCTCATACCC     | This paper | N/A |
| Exon 23, reverse: TTCCATTCGATGACCCTCTC     | This paper | N/A |
| Exon 24, forward: GAGAGGGTCATCGAATGGAA     | This paper | N/A |
| Exon 24, reverse: CCCCAGATCGTTTCTGTCAT     | This paper | N/A |
| Exon 25, forward: GACCAAAGCCTGACTCTGC      | This paper | N/A |
| Exon 25, reverse: AGGCTCCTCCCTTCAGTCTC     | This paper | N/A |
| Exon 26, forward: GCCTCCCACCAAATCTCTCT     | This paper | N/A |
| Exon 26, reverse: TATCTGCCACTCTGCCACT      | This paper | N/A |
| Exon 27, forward: GAGCAGAGGGGAAGTCCAG      | This paper | N/A |
| Exon 27, reverse: CATCCAGATGGTGCTGTGAG     | This paper | N/A |
| Exon 28-29, forward: ATGCCTCTCCCATTTGTCATC | This paper | N/A |
| Exon 28-29, reverse: GACTTCCATGGGTTGTAGCC  | This paper | N/A |
| Exon 30, forward: TGGGCAACAGAGTGAGACC      | This paper | N/A |

---

---

|                                          |            |     |
|------------------------------------------|------------|-----|
| Exon 30, reverse: CCAGTGCTTTCCATTTTTGCT  | This paper | N/A |
| Exon 31, forward: GCTTCTGTGGCTGCATCTG    | This paper | N/A |
| Exon 31, reverse: GAGCTGGTGGGTAGAAGCTG   | This paper | N/A |
| Exon 32, forward: GGGGAAGTGCTCAGTCAGTC   | This paper | N/A |
| Exon 32, reverse: CCTGCTCCTAAGTCCTTGCT   | This paper | N/A |
| Exon 33-1, forward: TGCTTCCAGAGGGCTATGAC | This paper | N/A |
| Exon 33-1, reverse: CACCAGGGTGTAGGATTTGG | This paper | N/A |
| Exon 33-2, forward: GGGGTAGGGAGGTCTCAGAA | This paper | N/A |
| Exon 33-2, reverse: GCATCTGCAAATTGAAGCAA | This paper | N/A |
| Exon 33-3, forward: CTCGGCTGTTTTCTGCATT  | This paper | N/A |
| Exon 33-3, reverse: GGGTCGGGCTCTCTCCTC   | This paper | N/A |

#### Reagents used in CRISPR/Cas9 genome editing

|                                                                                                                                                                                                                              |                   |             |
|------------------------------------------------------------------------------------------------------------------------------------------------------------------------------------------------------------------------------|-------------------|-------------|
| Guide-it™ Recombinant Cas9                                                                                                                                                                                                   | Takara Clontech   | Cat# 631442 |
| crRNA:<br>GAGCUAUGCUGUUUUG caggguguaggauuggaauGUUUUA                                                                                                                                                                         | FASMAC            | N/A         |
| tracrRNA:<br>AAACAGCAUAGCAAGUUAAAAUAAGGCUAGUCCGUUAUCAAC<br>UUGAAAAAGUGGCACCGAGUCGUGUCU                                                                                                                                       | FASMAC            | N/A         |
| Single strand DNA containing (c.6307 G>A, mouse Dscaml1):<br>AAACAGCAUAGCAAGUUAAAAUAAGGCUAGUCCGUUAUCAAC<br>UUGAAAAAGUGGCACCGAGUCGUGUCUACCCAGGGGTAGGG<br>CGTTCTCAGAAACAGGGGGCTGGCACCTATTCCAAATCCTACAC<br>CTGGTGTAGGATGGCCGACA | Eurofins genomics | N/A         |

#### Primer sequences used for off-target candidates

|                                                |            |     |
|------------------------------------------------|------------|-----|
| Chr 4; 144587444 forward: TTCTTCACACGCTTGGTCAG | This paper | N/A |
| Chr 4; 44587444 reverse: CTATTCCCAAACGCAGAAGC  | This paper | N/A |
| Chr 9; 59380429 forward: TAAAGAAAAAGCCCCACCT   | This paper | N/A |
| Chr 9; 59380429 forward: TGGCTGAGACCAGTGTGAC   | This paper | N/A |

---

---

|                                                |            |     |
|------------------------------------------------|------------|-----|
| Chr 15; 99249433 forward: CCAGCCCCTTACCTTCTTCT | This paper | N/A |
| Chr 15; 99249433 reverse: GCCAGACACTGCTGGAAAGT | This paper | N/A |

### Chemicals, reagents or resources

|                                               |                |                                 |
|-----------------------------------------------|----------------|---------------------------------|
| Medetomidine Hydrochloride                    | Fuji film-WAKO | Cas RNR:86347-15-1              |
| Midazolam injection 10mg 'Sandoz'             | FujiPharma     | Cas RNR:59467-70-8              |
| Butorphanol Tartrate                          | Fuji film-WAKO | Cas RNR:58786-99-5              |
| XylocaineR Jelly 2% (Lidocaine hydrochloride) | Aspen Japan    | Cas RNR:137-58-6                |
| Isoflurane anesthesia                         | Fuji film-WAKO | Cat# 099-06571, CAS# 26675-46-7 |
| pEGFP-C1                                      | Clontech       | Cat# 6084-1 (discontinued)      |
| pCAG-IRES2-GFP                                | Clontech       | Cat# 6029-1 (discontinued)      |
| DSCAML1 (NM_020693) Human Untagged Clone      | Origene        | Cat# SC304796                   |
| Dscaml1 (NM_001081270) Mouse Untagged Clone   | Origene        | Cat# MC225176                   |
| pSV2-neo                                      | ATCC           | ATCCR37149TM                    |
| BamHI restriction enzyme                      | NEB            | Cat# R0136S                     |
| NarI restriction enzyme                       | NEB            | Cat# R0190L                     |
| NuSieveTM 3:1 Agarose                         | Lonza          | Cat# 5001                       |
| DAPI (1:50000)                                | Thermo Fisher  | Cat# D1306, CAS# 28718-90-3     |
| TO-PROTM-3 Iodoid (642/661) (TOPRO3)          | Thermo Fisher  | Cat# T3605                      |
| Meyer's Hematoxylin stain                     | Muto, Japan    | Cat# 30001                      |

### Equipment and software

|               |                         |                   |
|---------------|-------------------------|-------------------|
| ABI sequencer | Thermo Fisher           | Cat# ABI 3730     |
| CMOS camera   | Brainvision Inc., Tokyo | Cat# MiCAM Ultima |

---



|                                  |                  |                                                                                                                                                                                               |
|----------------------------------|------------------|-----------------------------------------------------------------------------------------------------------------------------------------------------------------------------------------------|
| Epifluorescence optics           | Olympus          | Tominaga et al., 2000                                                                                                                                                                         |
| MapManager QTX                   | MapManager       | Manly et al. 2001                                                                                                                                                                             |
| Leica Application Suite software | Leica            | <a href="https://www.leica-microsystems.com/">https://www.leica-microsystems.com/</a>                                                                                                         |
| Zen software                     | Zeiss microscopy | <a href="https://www.zeiss.co.jp/microscopy/int/products/microscope-software/zen.html">https://www.zeiss.co.jp/microscopy/int/products/microscope-software/zen.html</a> ;<br>RRID: SCR_013672 |
| SleepSign for ECoG               | Kissei Comtec    | <a href="https://www.kicnet.co.jp/solutions/biosignal/sleep/eeg_sensor_za/">https://www.kicnet.co.jp/solutions/biosignal/sleep/eeg_sensor_za/</a>                                             |
| Prism5                           | GraphPad         | <a href="https://www.graphpad.com/scientific-software/prism/">https://www.graphpad.com/scientific-software/prism/</a> ;<br>RRID:SCR_002798                                                    |

<sup>a</sup> The *D8Mhos3*, *6*, *9*, *11* & *18* markers were newly developed at  $(CA)_n$  microsatellite regions between exons 8 & 21 in the *Dscaml1* genome (NC\_005107.3 (48363393..48680159) Chr8|Rnor\_5.0, NCBI). *D8Mhos3*, *6*, *9*, *11* & *18* are polymorphic between IER and WKHA, and *D8Mhos6*, *9*, *11* & *18* polymorphic between IER and WKY, respectively.

**Supplemental Table 2. Genotype and minor allele frequency of 2 polymorphisms in the *DSCAML1* gene**

| <b>SNP name</b> | <b>Chromosome (GRCh37)</b> | <b>Nucleotide change</b> | <b>Reference number in dbSNP</b> | <b>Exon</b> | <b>MAF in HGVD<sup>a</sup></b> | <b>MAF in Tommo<sup>b</sup></b> | <b>MAF in ExAc<sup>c</sup></b> | <b>MAF in ExAc (East Asian)</b> |
|-----------------|----------------------------|--------------------------|----------------------------------|-------------|--------------------------------|---------------------------------|--------------------------------|---------------------------------|
| H232N           | 117403235                  | c.694C>A                 | rs3741280                        | exon4       | 0.5694                         | 0.558                           | 0.3667                         | 0.5332                          |
| A2105T          | 117299073                  | c.6313G>A                | rs199968404                      | exon33      | 0                              | 0                               | 8.3×10 <sup>-6</sup>           | 0                               |

<sup>a</sup> Human Genetic Variation Disease. <sup>b</sup> Tohoku medical megabank organization. <sup>c</sup> The Exome Aggregation Consortium.

**Supplemental Table 3. The deleterious prediction of 2 polymorphisms in the DSCAML1 gene by ANNOVAR**

| <b>SNP name</b> | <b>SIFT</b> | <b>Polyphen2</b>  | <b>MutationTaster</b>  | <b>MutationAssessor</b> | <b>PROVEAN</b> |
|-----------------|-------------|-------------------|------------------------|-------------------------|----------------|
| H233N           | Tolerated   | Benign            | Polymorphism automatic | Neutral                 | Neutral        |
| A2105T          | Deleterious | Probably damaging | Disease causing        | Low                     | Neutral        |
